# Supplementary material
Source: PubMed Central journal article supplement (PMC7367677)

# THE LANCET HIV

## Supplementary appendix

This appendix formed part of the original submission and has been peer reviewed.  
We post it as supplied by the authors.

Supplement to: Chow EPF, Hocking JS, Ong JJ, Phillips TR, Fairley CK. Postexposure prophylaxis during COVID-19 lockdown in Melbourne, Australia. *Lancet HIV* 2020; published online July 17. [https://doi.org/10.1016/S2352-3018\(20\)30204-6](https://doi.org/10.1016/S2352-3018(20)30204-6).

## APPENDIX

**Figure S1. Weekly HIV post-exposure prophylaxis prescription at the Melbourne Sexual Health Centre, January to May, 2020. The red line represents the introduction of lockdown in Victoria, Australia, on March 23, 2020.**

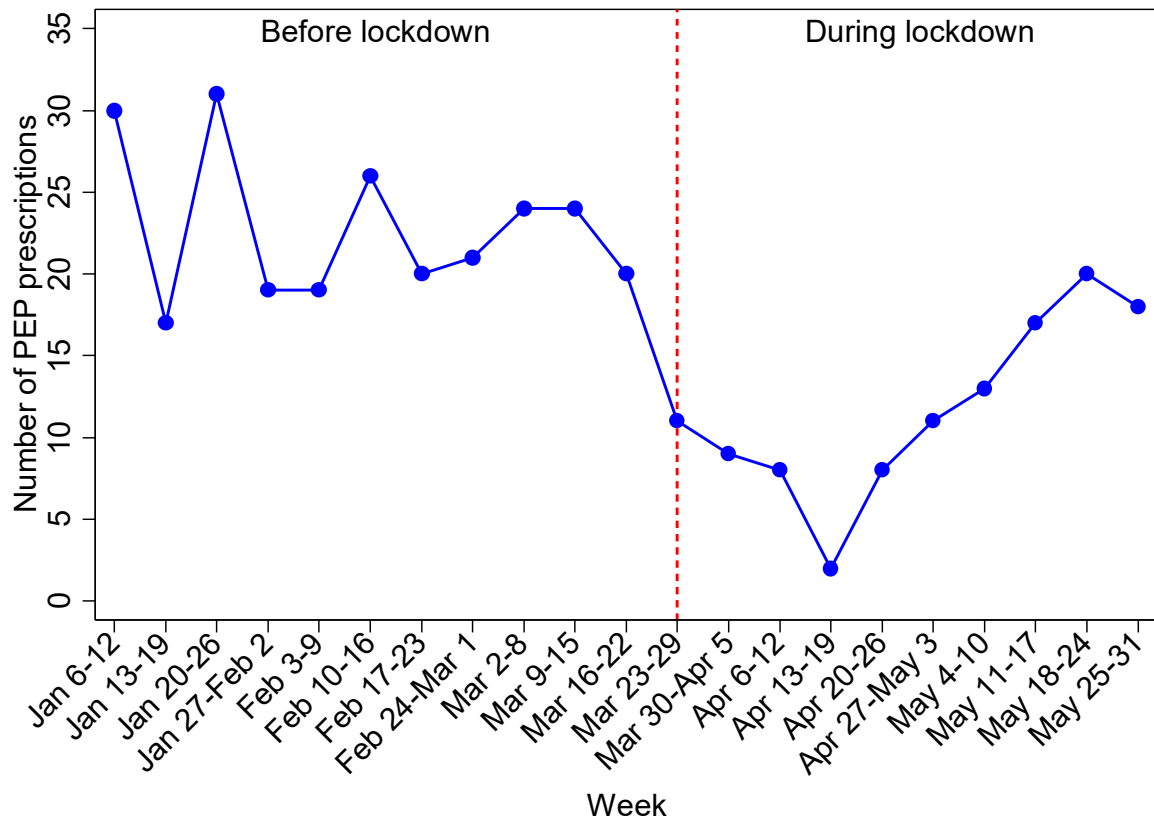

Supplement: mmc1.pdf [file mmc1.pdf]
